# Supplementary material
Source: MDPI journal article supplement (https://www.mdpi.com/2227-9040/6/3/34)
Supplement: s1 [file s1]

# Nanoporous Silica-Dye Microspheres for Enhanced Colorimetric Detection of Cyclohexanone

Zheng Li\*

Department of Chemical and Biomolecular Engineering, North Carolina State University, 911 Partner Way, Campus Box 7905, Raleigh, NC 27695, USA

\* Correspondence: zli47@ncsu.edu; Tel.: +1-217-418-9162

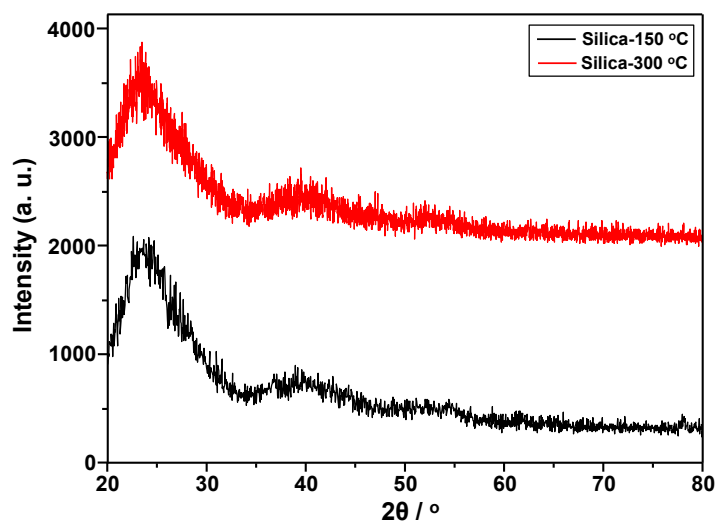

**Figure S1.** Powder XRD patterns of two silica-dye microspheres synthesized at 150 and 300 °C. The spectra confirm the amorphous structures of both microspheres.

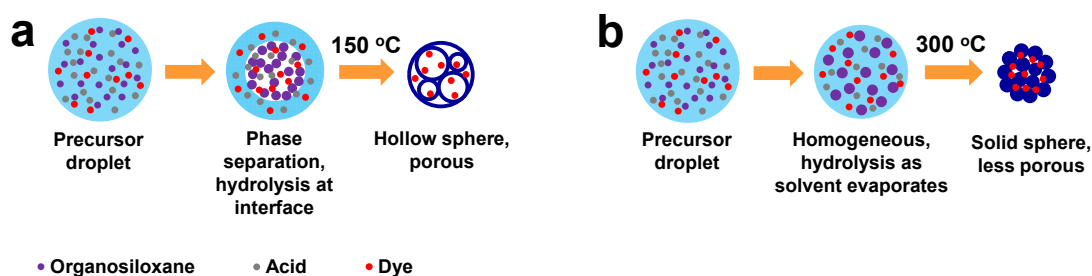

**Figure S2.** Proposed mechanisms showing the formation of porous microspheres at (a) 150 and (b) 300 °C.

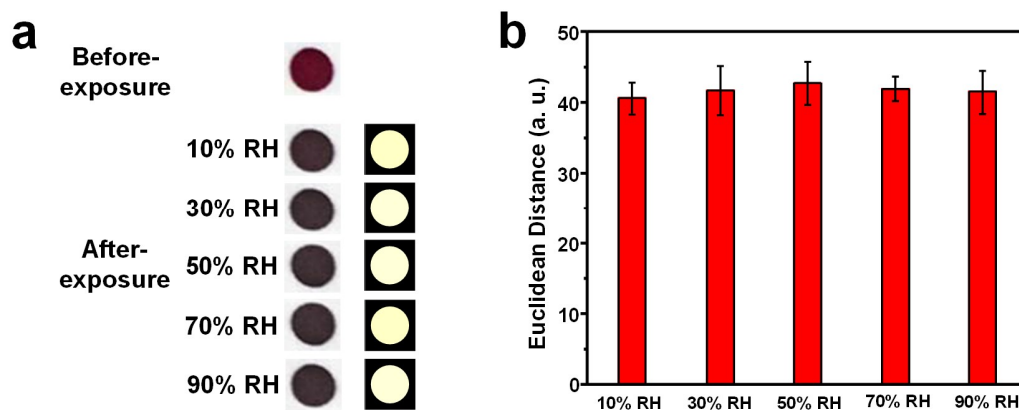

**Figure S3.** Humidity tests of microsphere-based sensors synthesized at 150 °C. (a) Before- and after-exposure images of the sensor spot and RGB difference profiles upon exposure of 1 ppm cyclohexanone with the 10%–90% relative humidity (RH), which is displayed in the color range of 3–10. (b) Sensor response to 1 ppm cyclohexanone at different levels of RH.
